# Supplementary material for: Reasonable regulation of flexible sulfur-based bifunctional catalytic electrodes for efficient seawater splitting
Source: Royal Society of Chemistry journal article supplement (doi:10.1039/d3qi02575f), 2024-01-01
Supplement: d3qi02575f1.pdf [file d3qi02575f1.pdf]

## Supporting Information

### **Reasonable regulation of flexible sulfur based bifunctional catalytic electrodes for efficient seawater splitting**

Fengjing Lei<sup>#a</sup>, Xunwei Ma<sup>#b</sup>, XinYun Shao<sup>a</sup>, Ziyang Fang<sup>a</sup>, Yuqin Wang<sup>a</sup>, Weiju

Hao<sup>\*a</sup>

<sup>a</sup>School of Materials and Chemistry, University of Shanghai for Science and Technology, Shanghai 200093, P. R. China.

<sup>b</sup>School of Resource and Environmental Engineering, Shanghai Polytechnic University, Shanghai 201209, P. R.

<sup>#</sup> The authors are equal to this work.

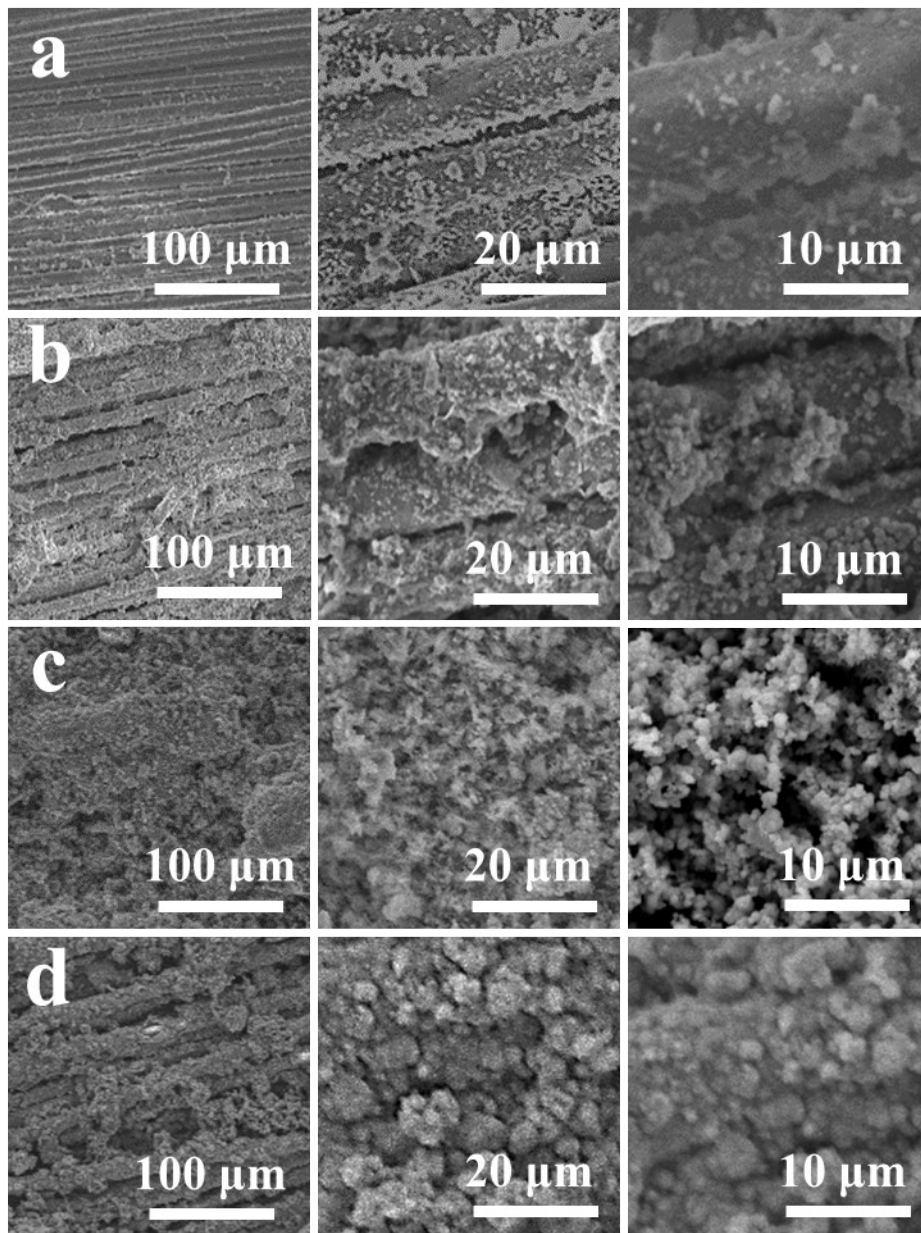

**Fig. S1** SEM images of (a) Fe-NiS@HA 3 h; (b) Fe-NiS@HA 6 h; (c) Fe-NiS@HA 12 h and (d) Fe-NiS@HA 24 h with different magnification.

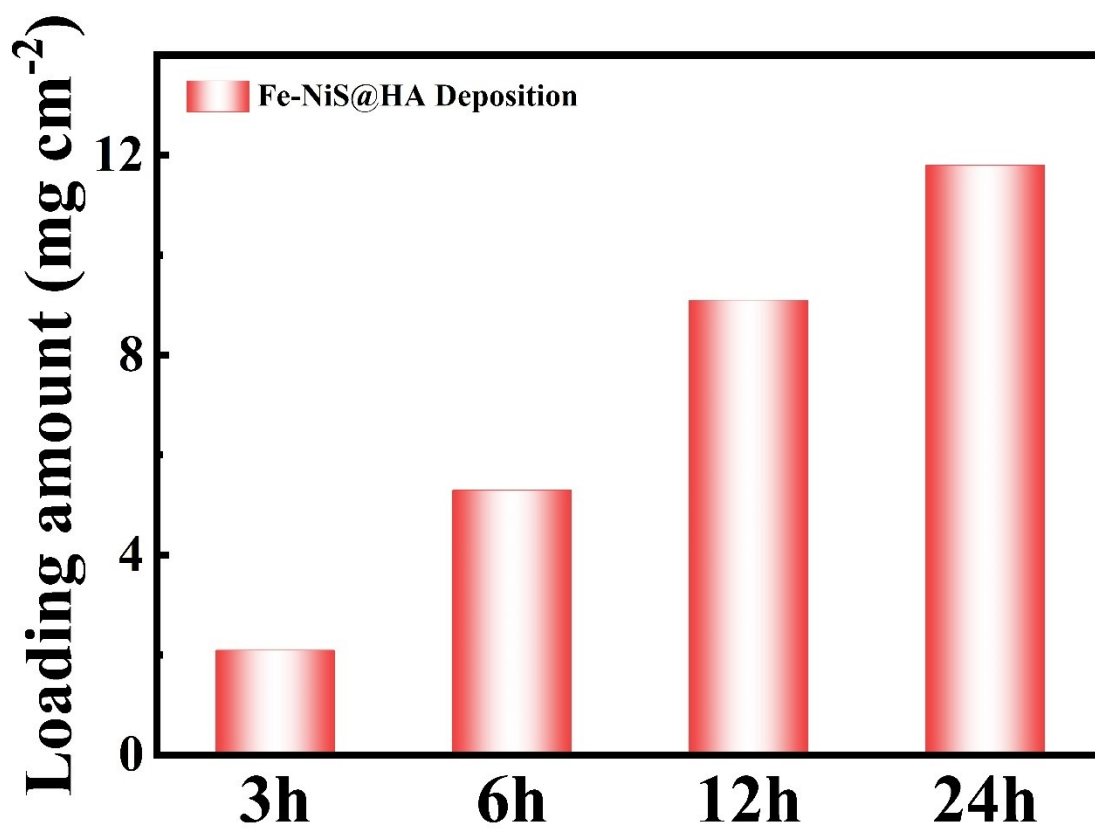

Fig. S2 Loading amount of Fe-NiS@HA with different electroless plating (EP) time.

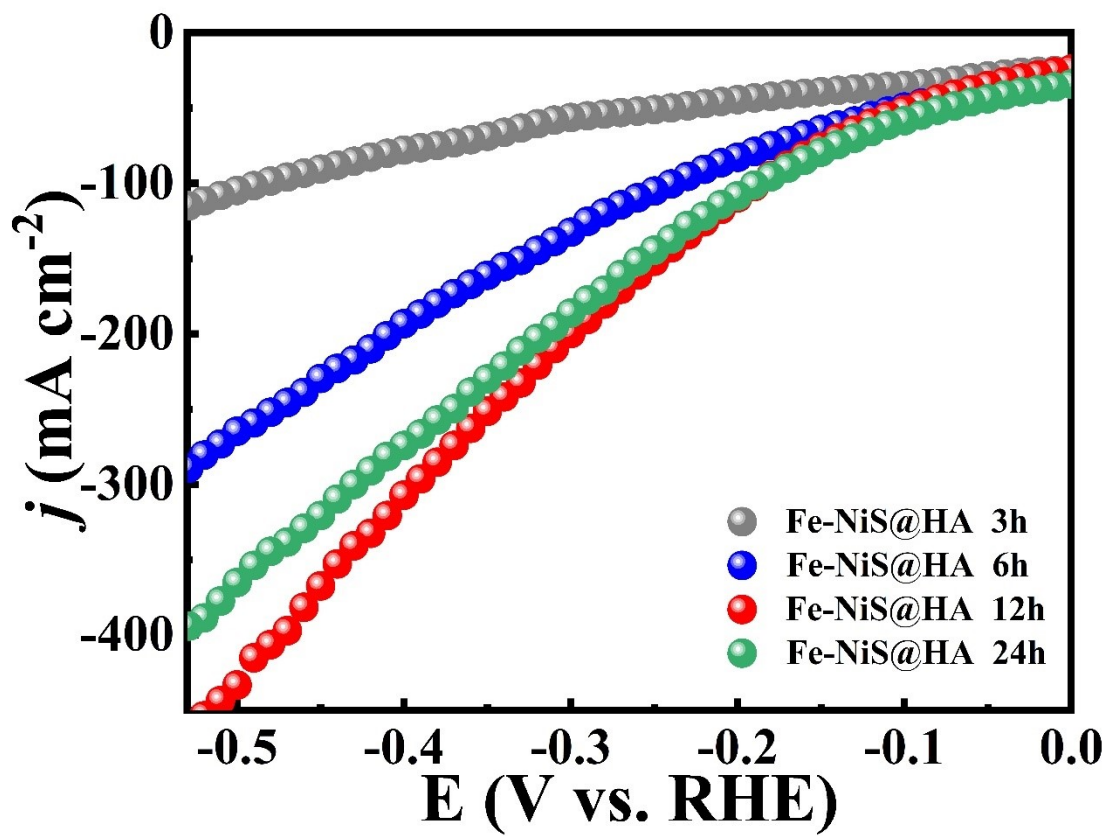

**Fig. S3**  $iR$ -uncorrected LSV curves of Fe-NiS@HA with different electroless plating (EP) time during HER process.

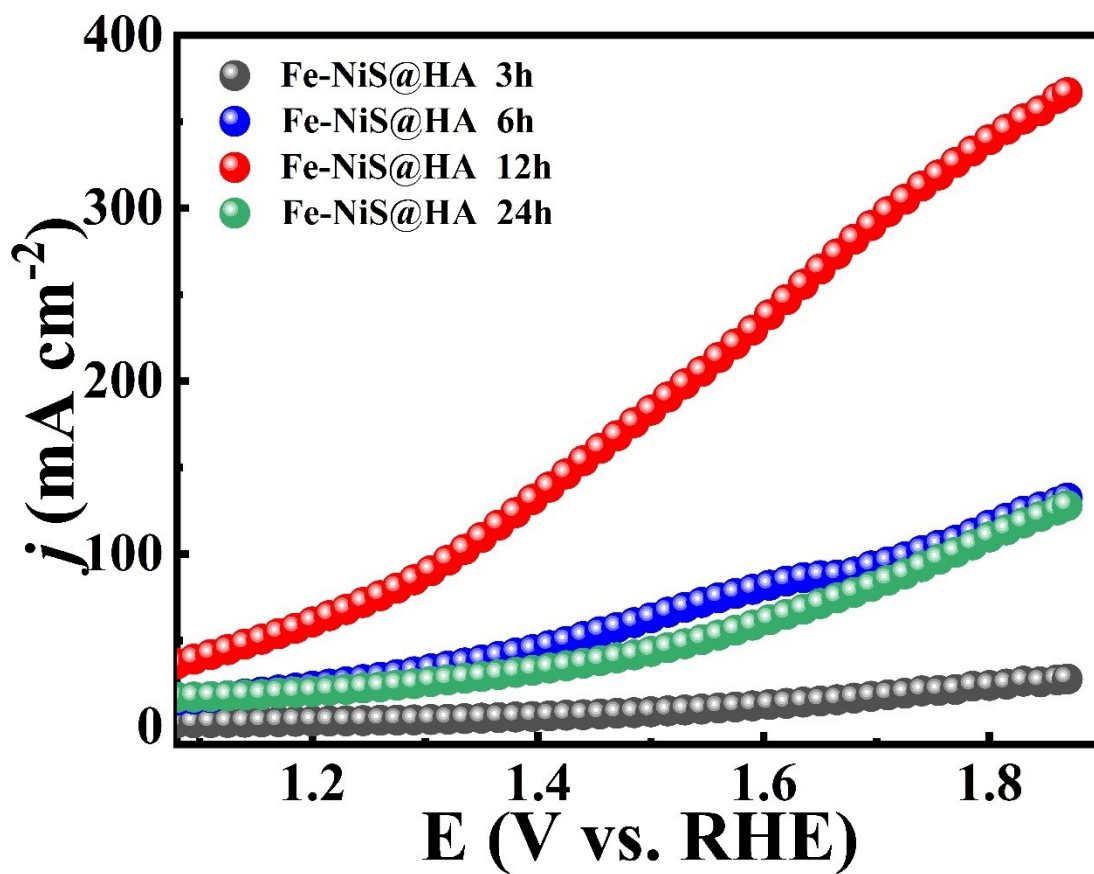

**Fig. S4** iR-uncorrected LSV curves of Fe-NiS@HA with different electroless plating (EP) time during OER process.

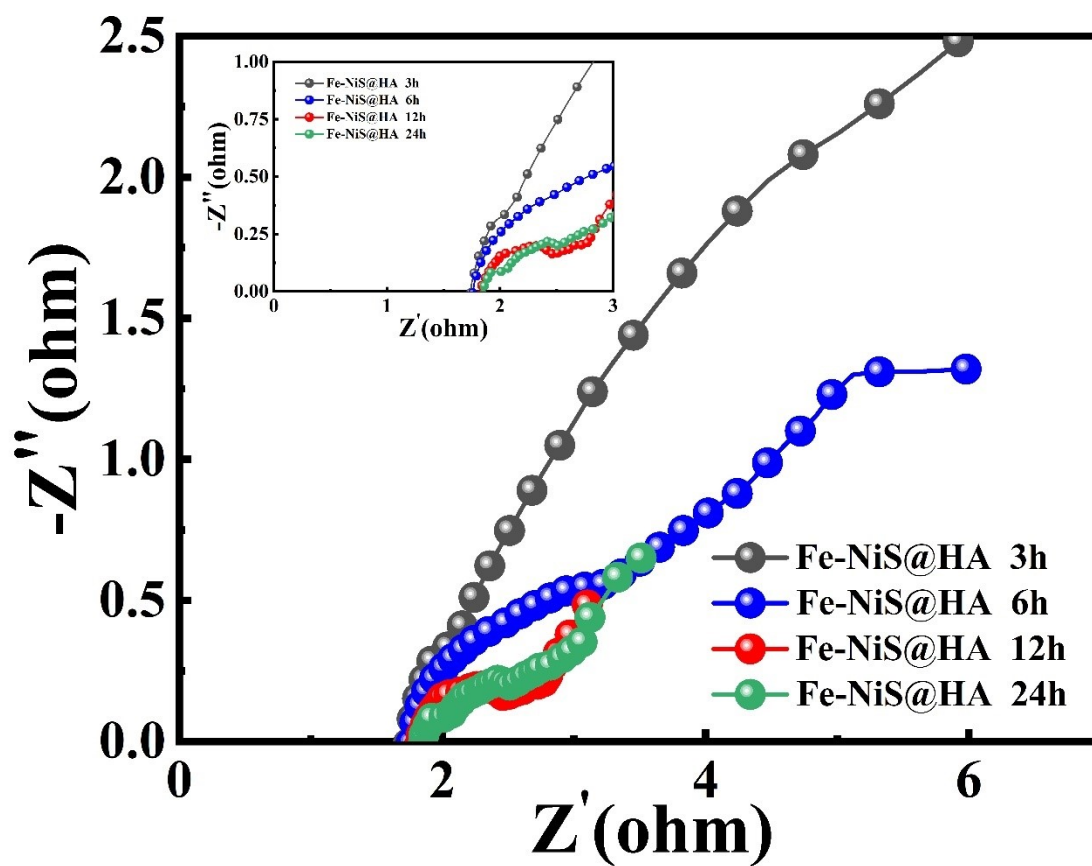

**Fig. S5** Nyquist plots derived from EIS measurements of Fe-NiS@HA with different electroless plating (EP) time during HER process.

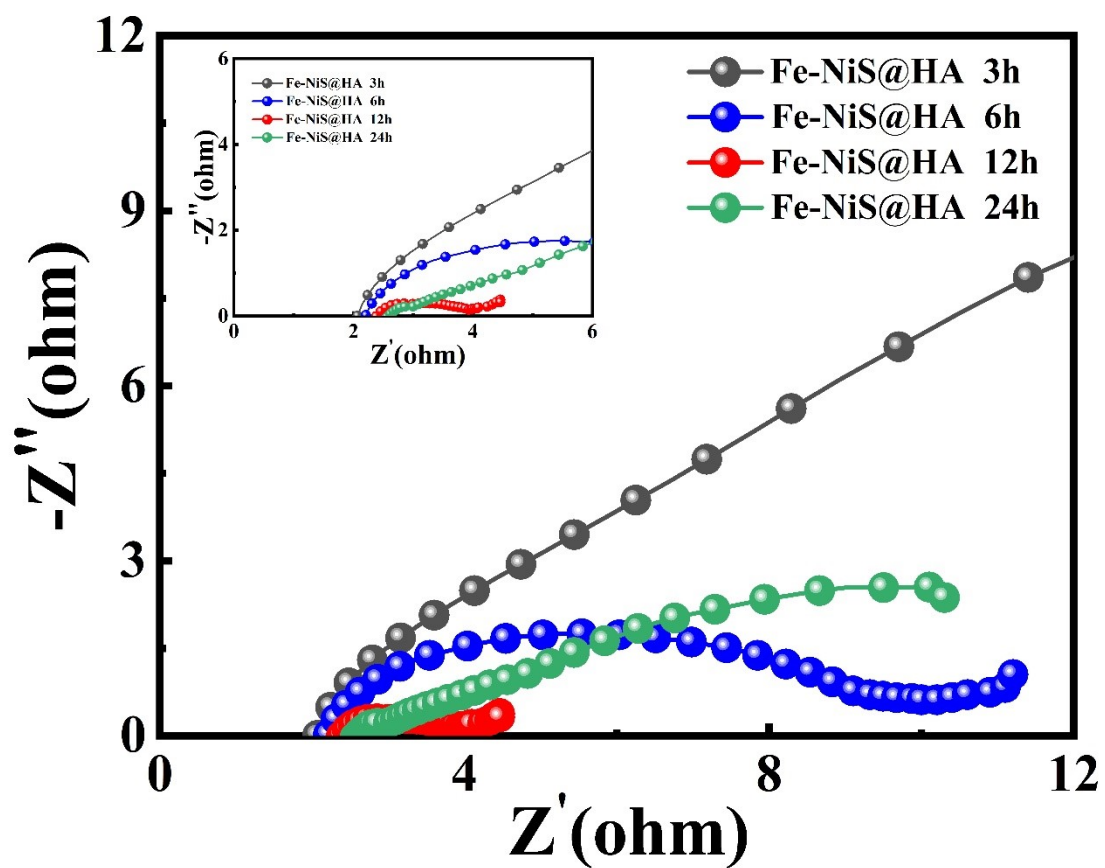

**Fig. S6** Nyquist plots derived from EIS measurements of Fe-NiS@HA with different electroless plating (EP) time during OER process.

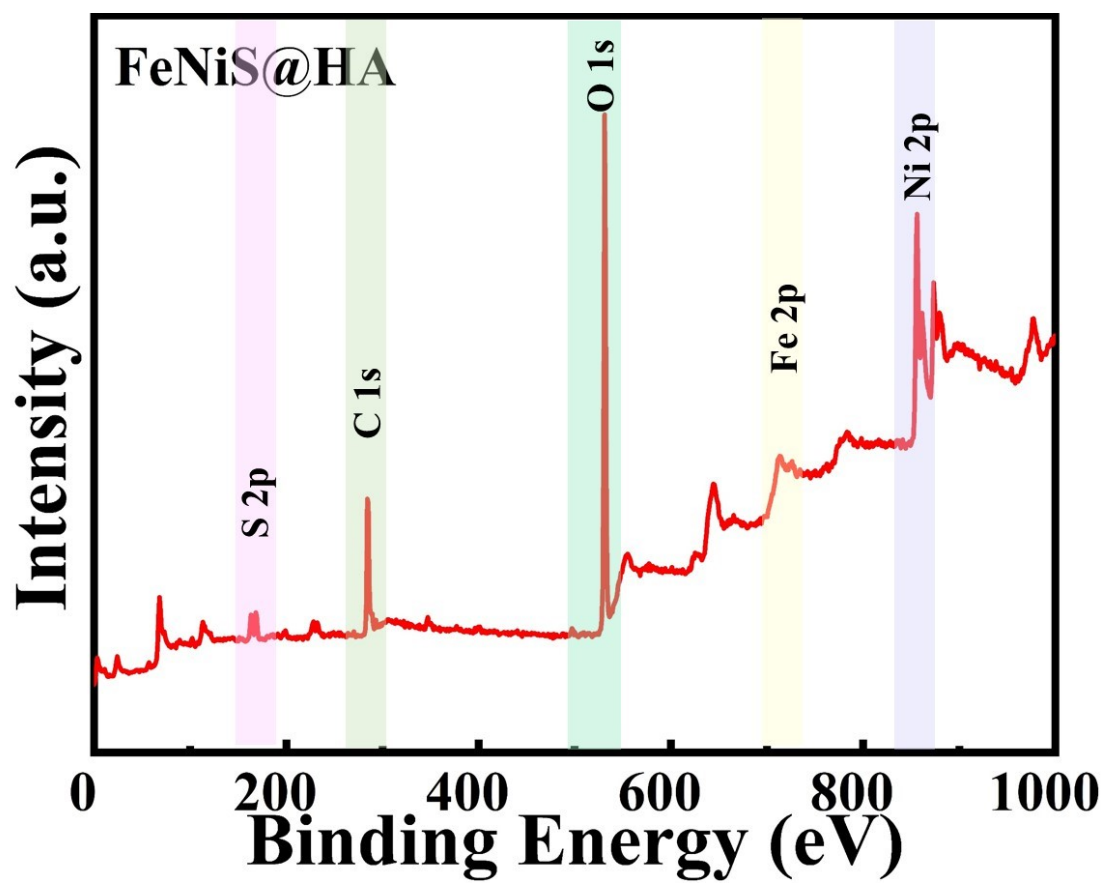

Fig.S7 High-resolution X-ray photoelectron spectroscopy spectrum of full for Fe-NiS@HA.



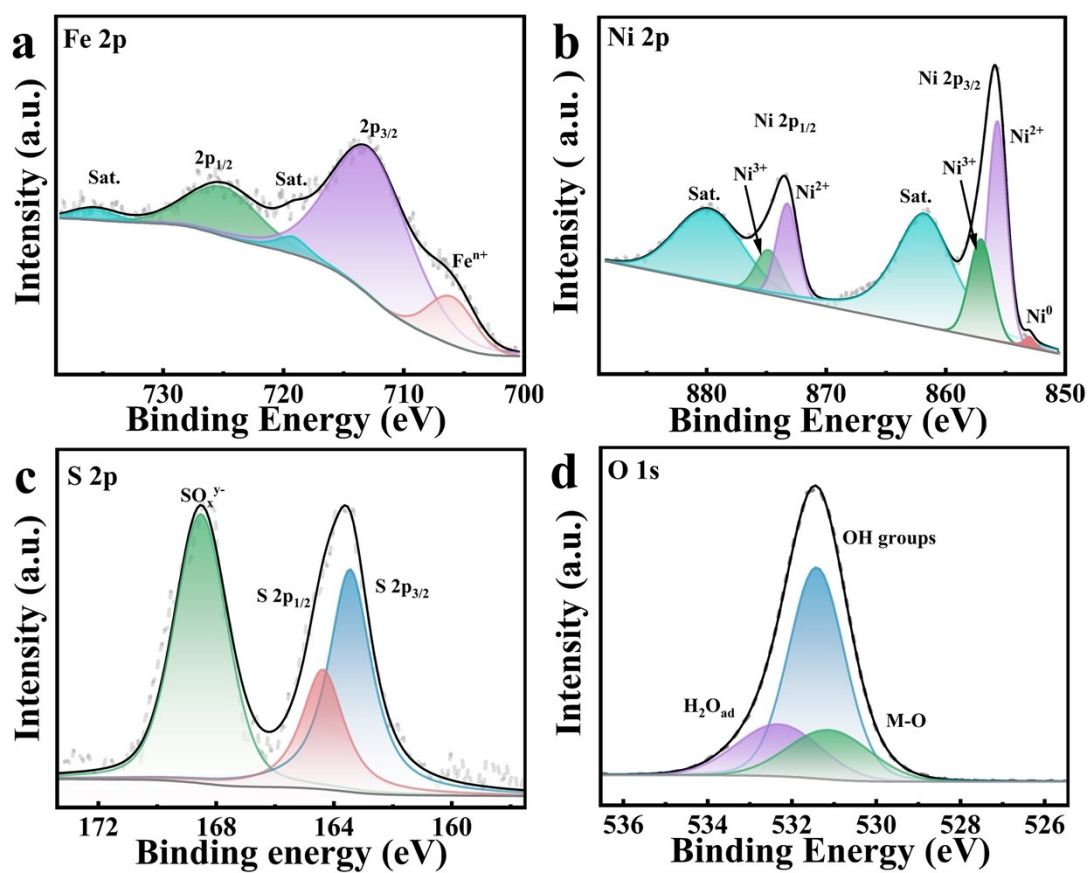

Fig. S8 High resolution XPS spectrum of (a) Fe 2p, (b) Ni 2p, (c) S 2p and (d) O 1s.

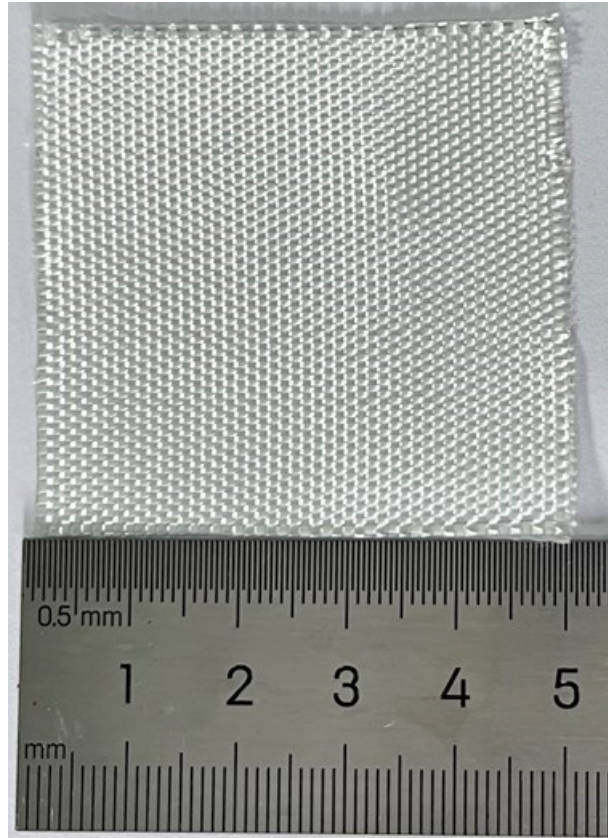

**Fig. S9** Bare HA is observed in the macroscopic scale.

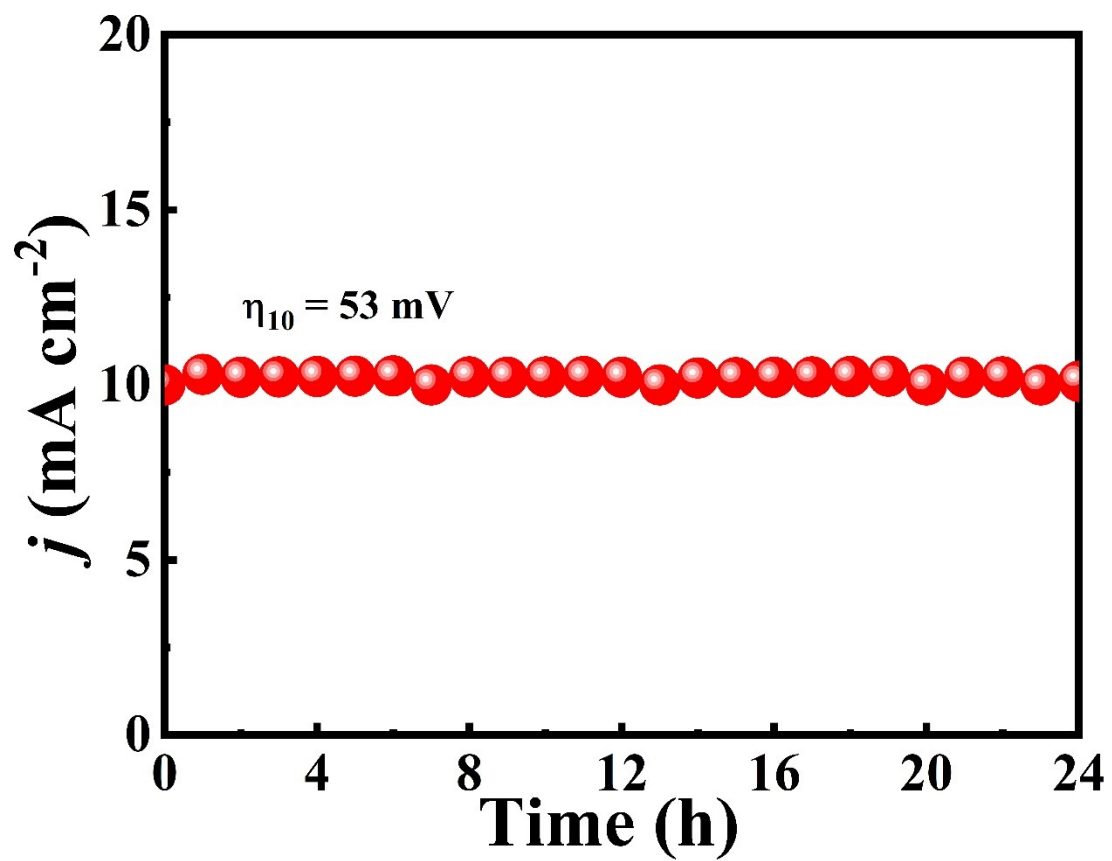

Fig. S10 Chronopotentiometry ( $j-t$ ) curve of Fe-NiS@HA for HER at 10 mA cm<sup>-2</sup>.

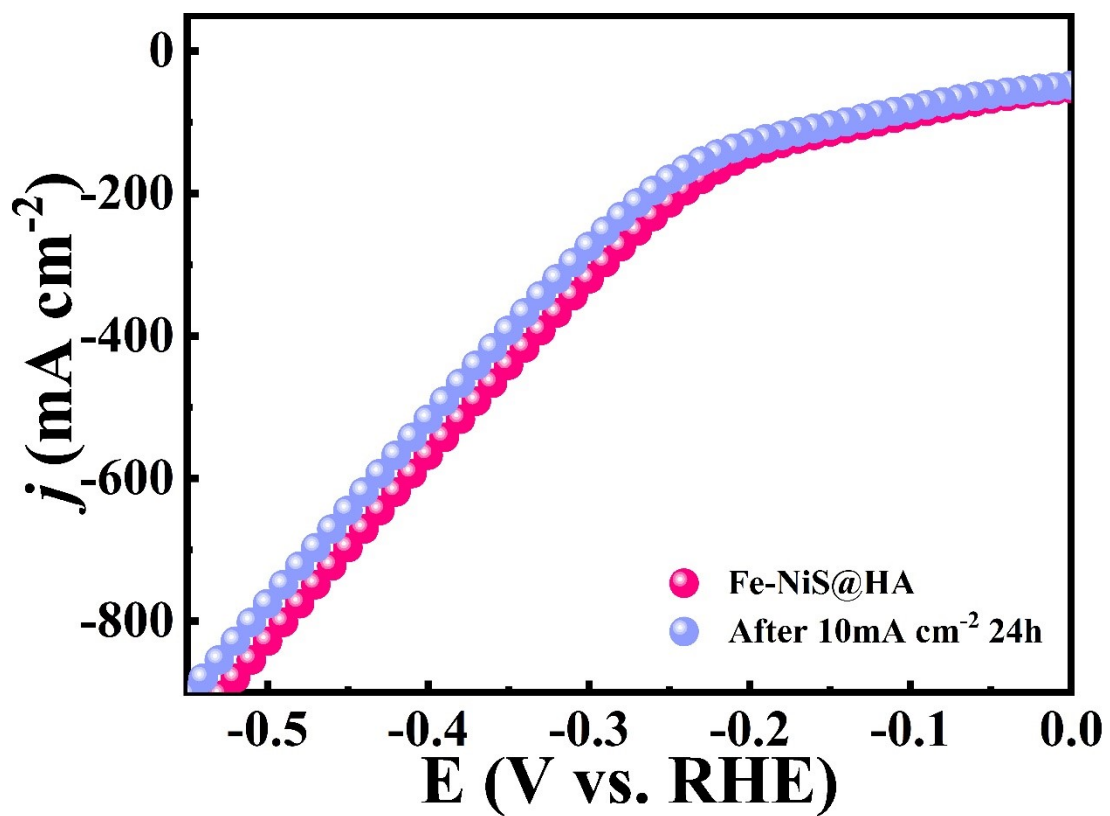

**Fig. S11** LSV curves of Fe-NiS@HA before and after 24 h chronoamperometric response for HER at 10 mA cm<sup>-2</sup>.

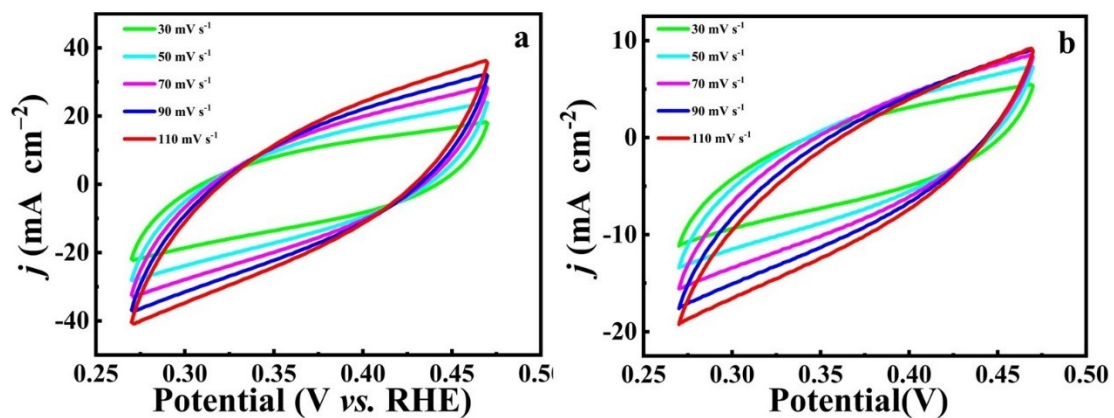

**Fig. S12** CV curves within a non-faradaic reaction region of 0.25 ~ 0.5 V (vs. RHE) at different scan rates toward HER for Fe-NiS@HA(a) and NiS@HA(b)

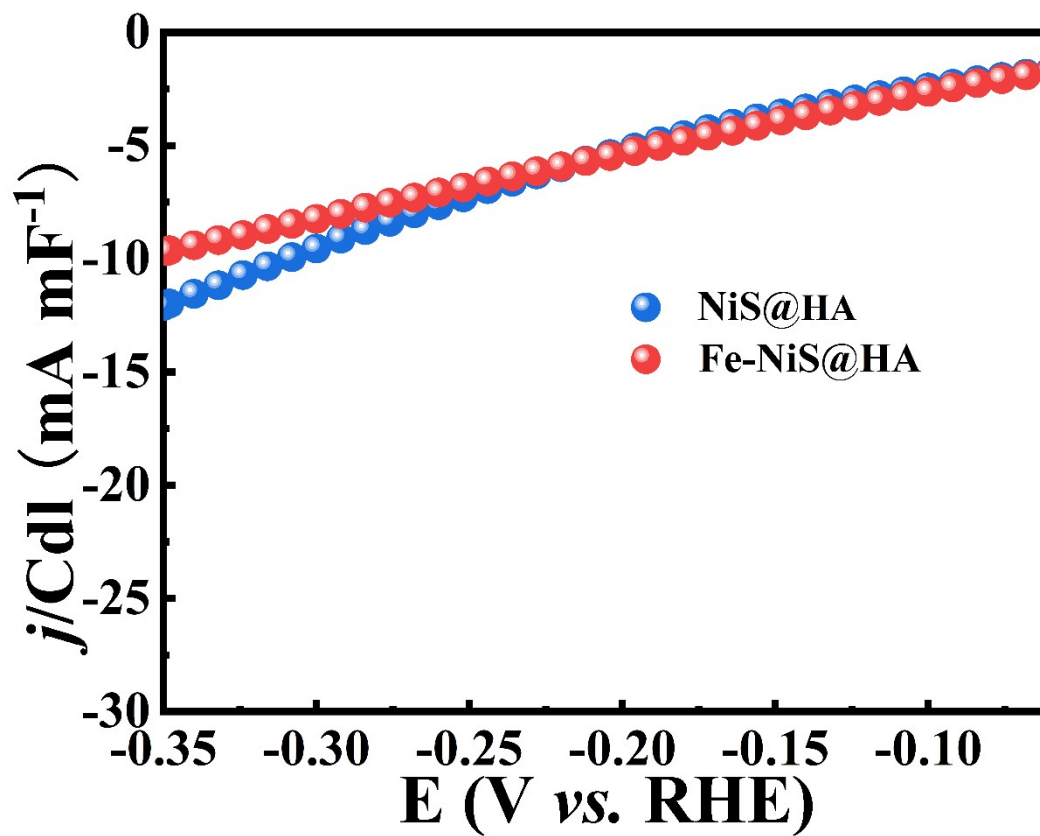

**Fig. S13**  $C_{dl}$ -normalized LSV curves of Fe-NiS@HA and NiS@HA for HER.

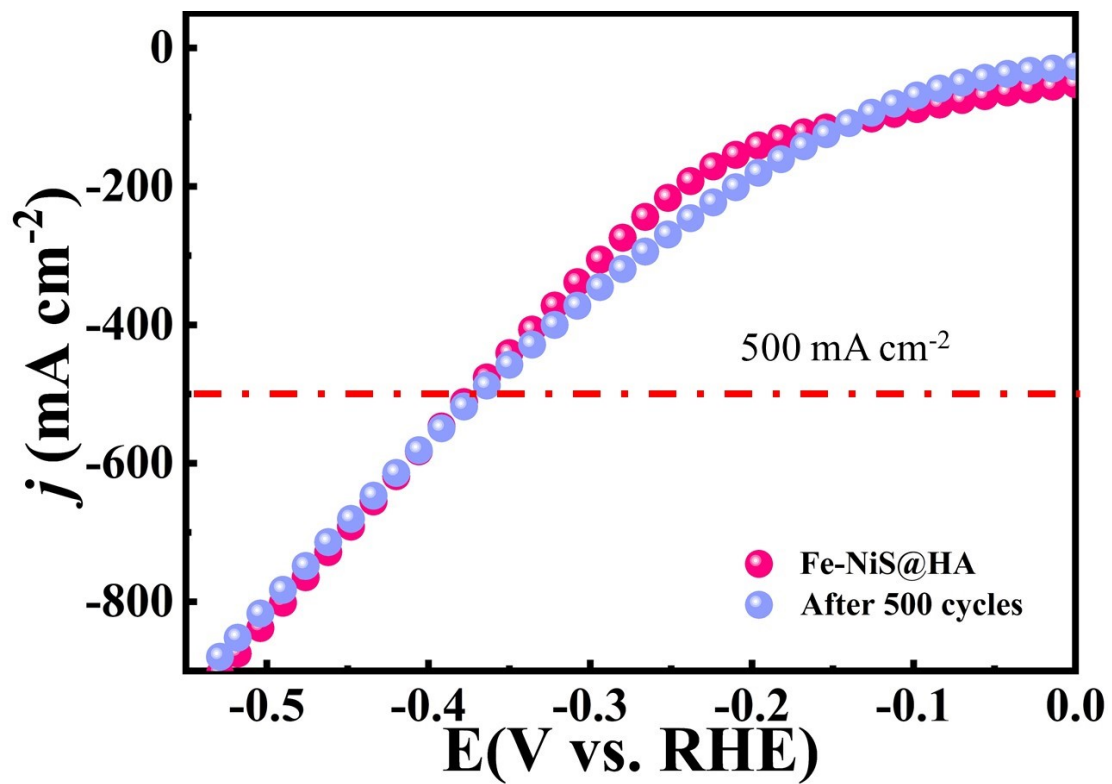

Fig. S14 LSV curves of Fe-NiS@HA before and after 500 HER cycles.

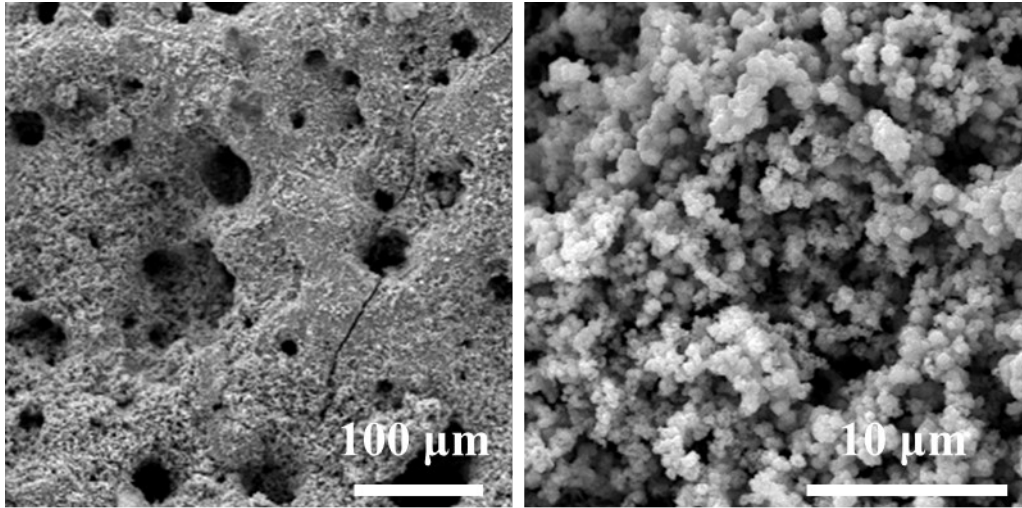

**Fig. S15** SEM images of Fe-NiS@HA after HER stability test.



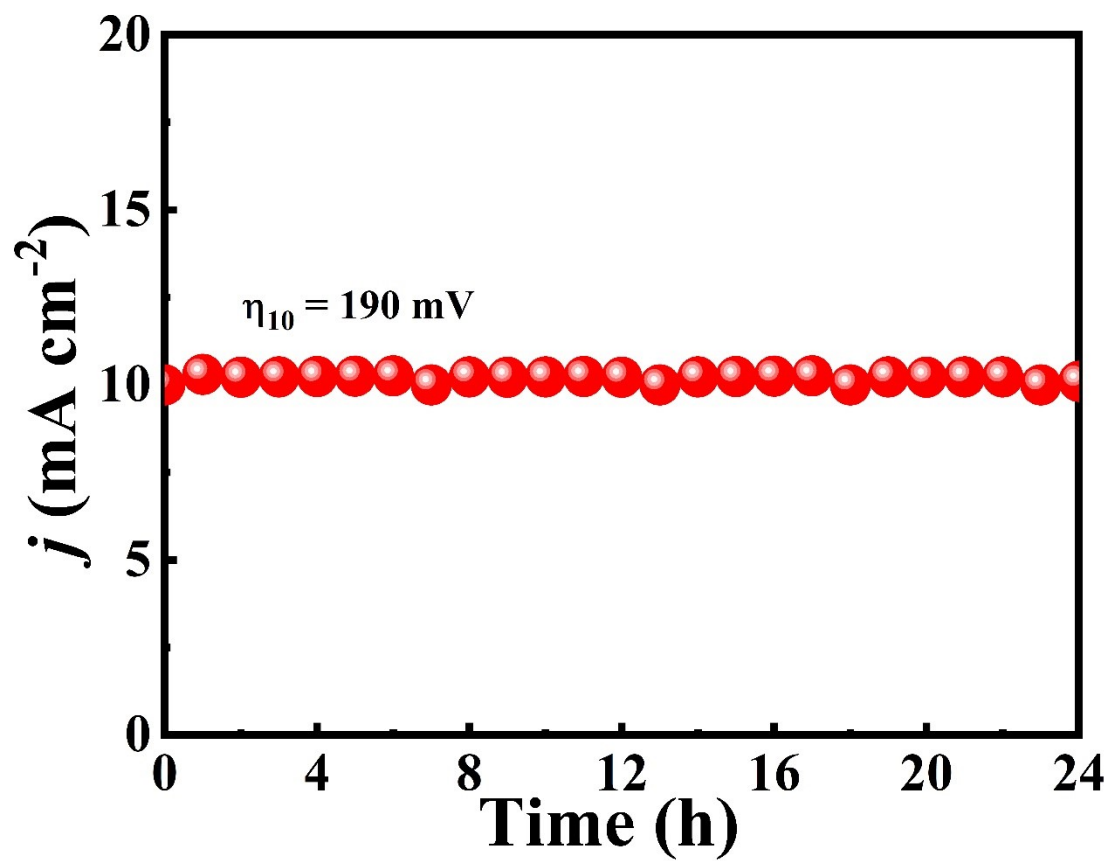

Fig. S16 Chronopotentiometry (j-t) curve of Fe-NiS@HA for OER at 10 mA cm<sup>-2</sup>.

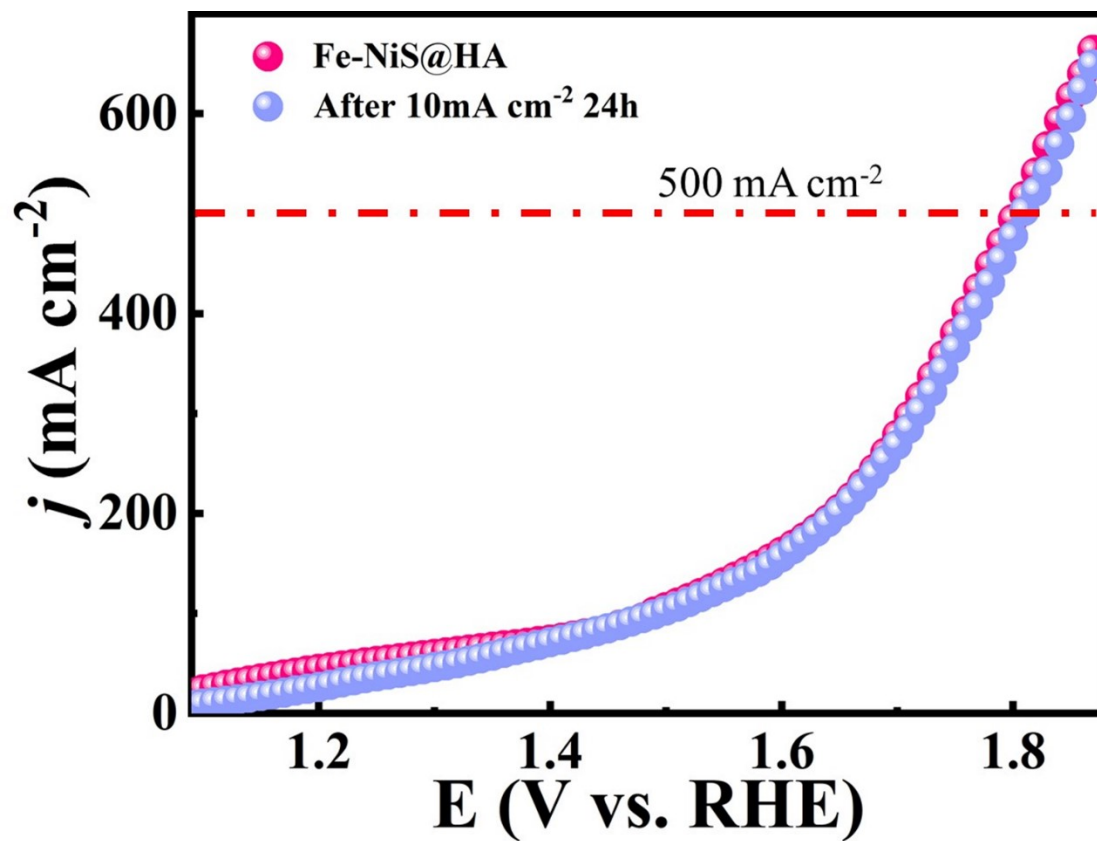

Fig. S17 LSV curves of Fe-NiS@HA before and after 24 h chronoamperometric response for OER at 10 mA cm<sup>-2</sup>.

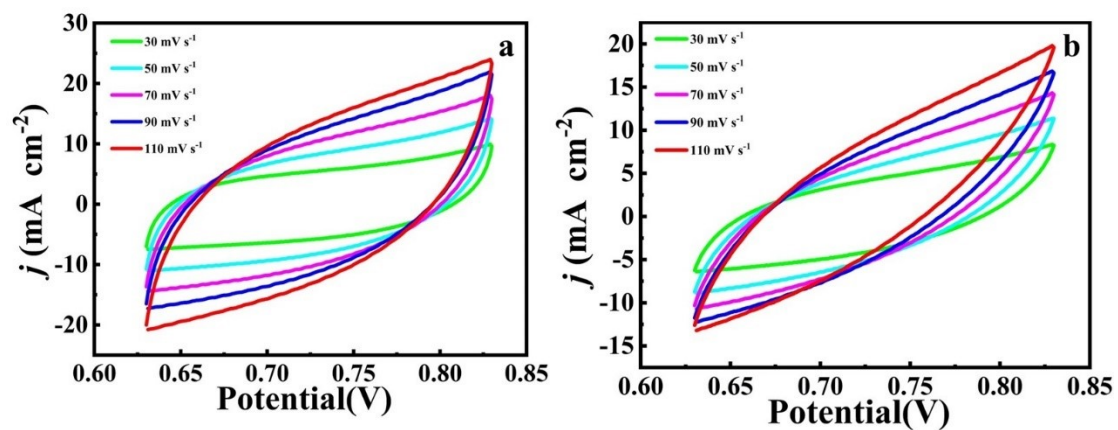

**Fig. S18** CV curves within a non-faradaic reaction region of 0.85~1.10 V (vs. RHE) at different scan rates toward OER for Fe-NiS@HA(a) and NiS@HA(b)

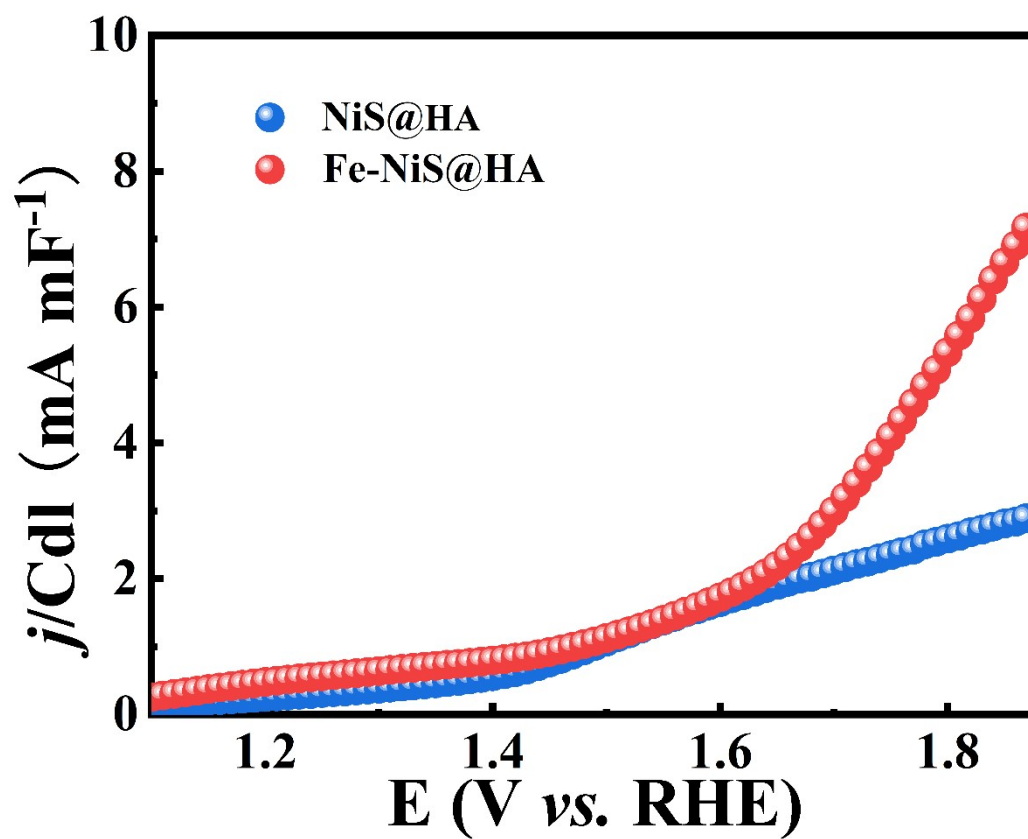

**Fig. S19**  $C_{dl}$ -normalized LSV curves of Fe-NiS@HA and NiS@HA for OER.

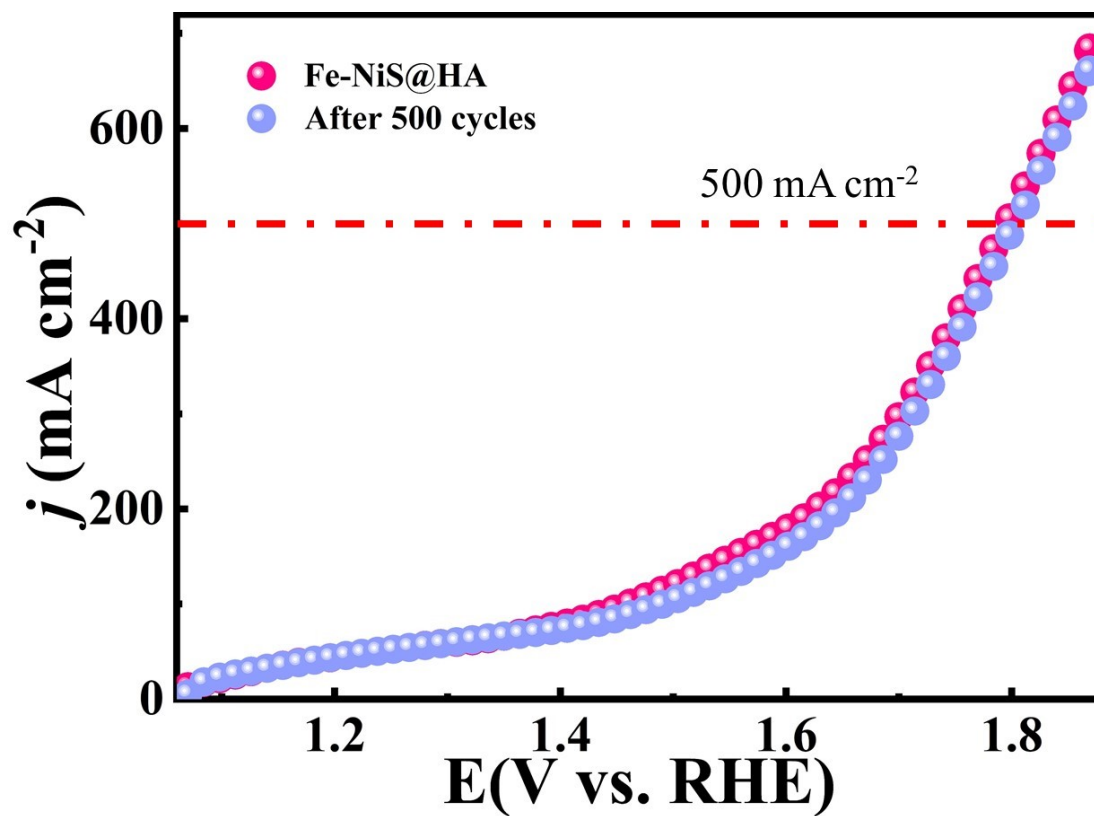

Fig. S20 LSV curves of Fe-NiS@HA before and after 500 OER cycles.

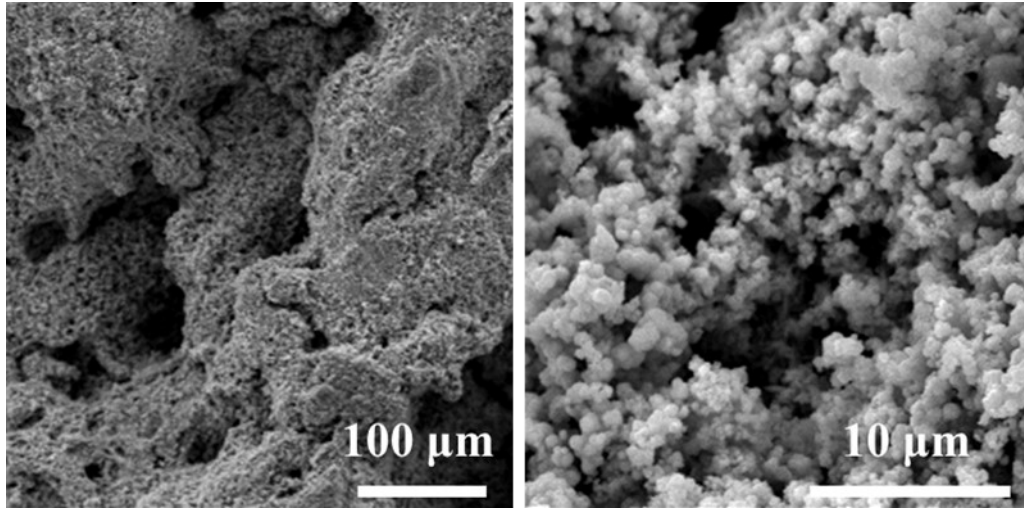

**Fig. S21** SEM images of Fe-NiS@HA after OER stability test.

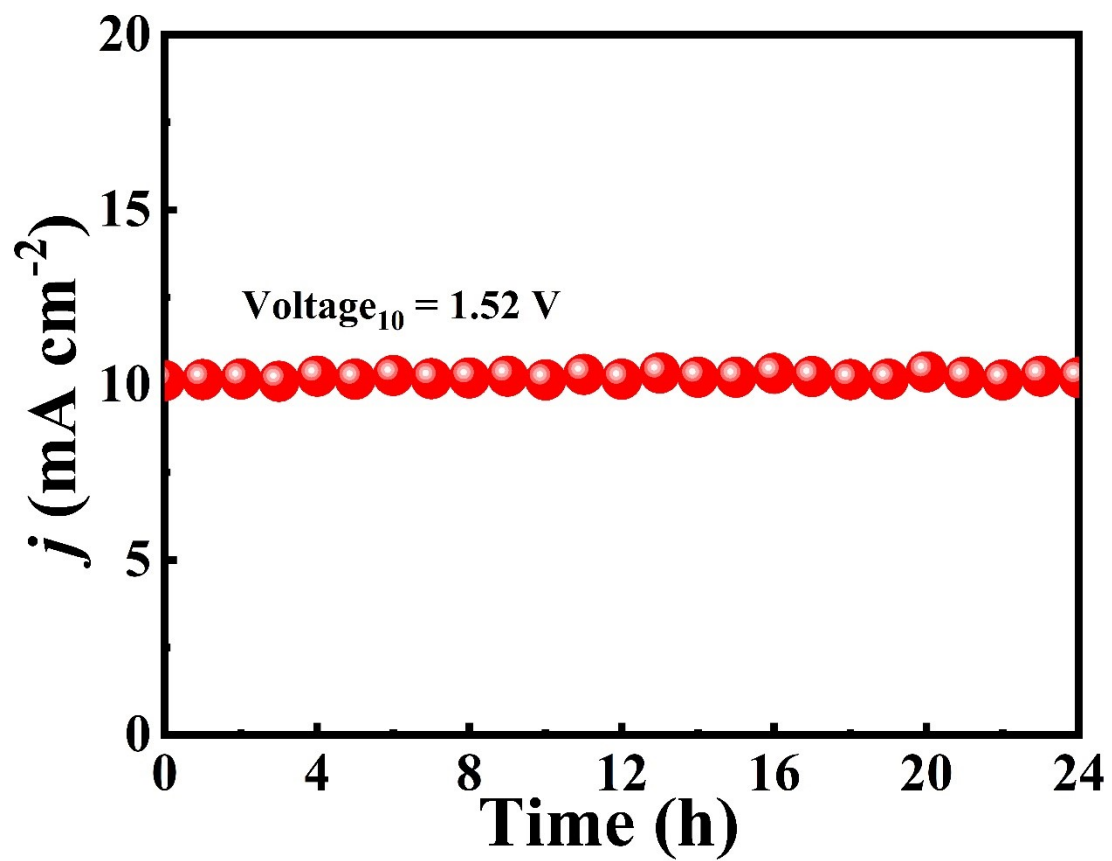

**Fig. S22** Chronopotentiometry (j-t) curve of Fe-NiS@HA for overall seawater splitting at 10 mA cm<sup>-2</sup>.

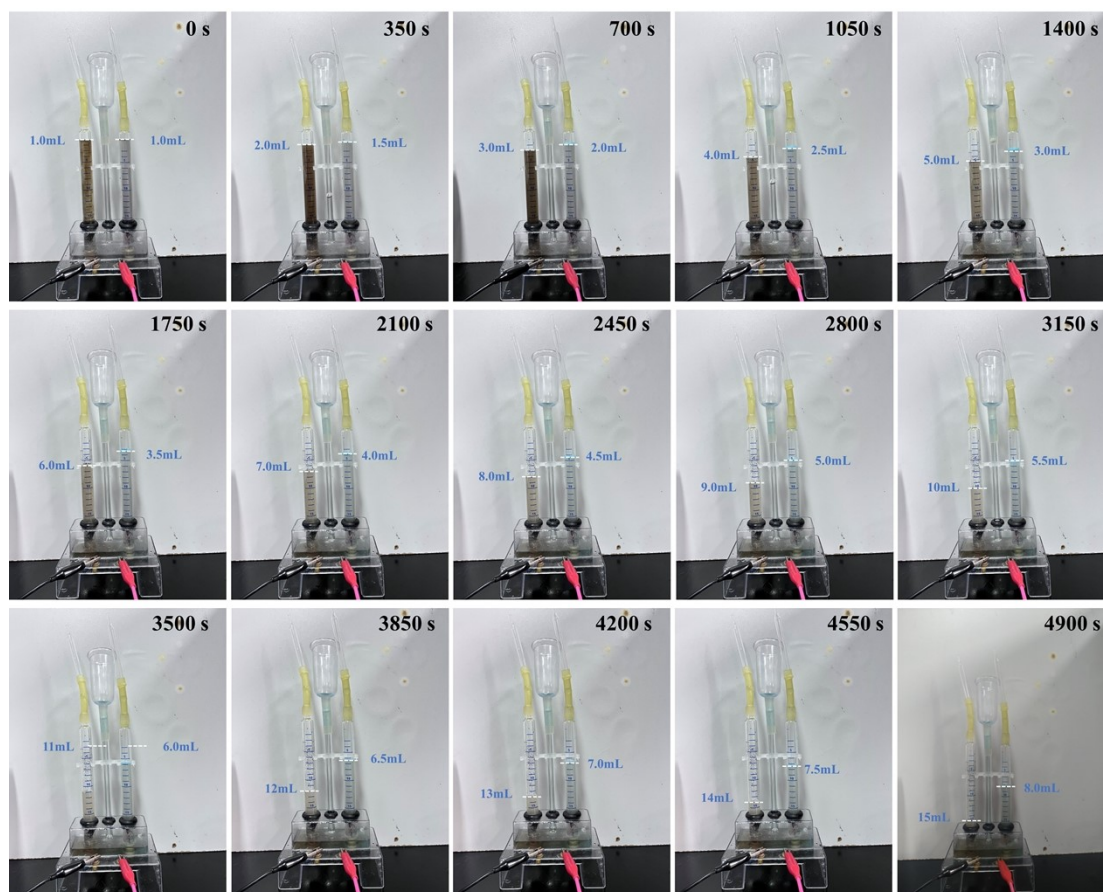

**Fig. S23** The generation amount of H<sub>2</sub> and O<sub>2</sub> collected per 350 seconds at the current density of 100 mA cm<sup>-2</sup>.



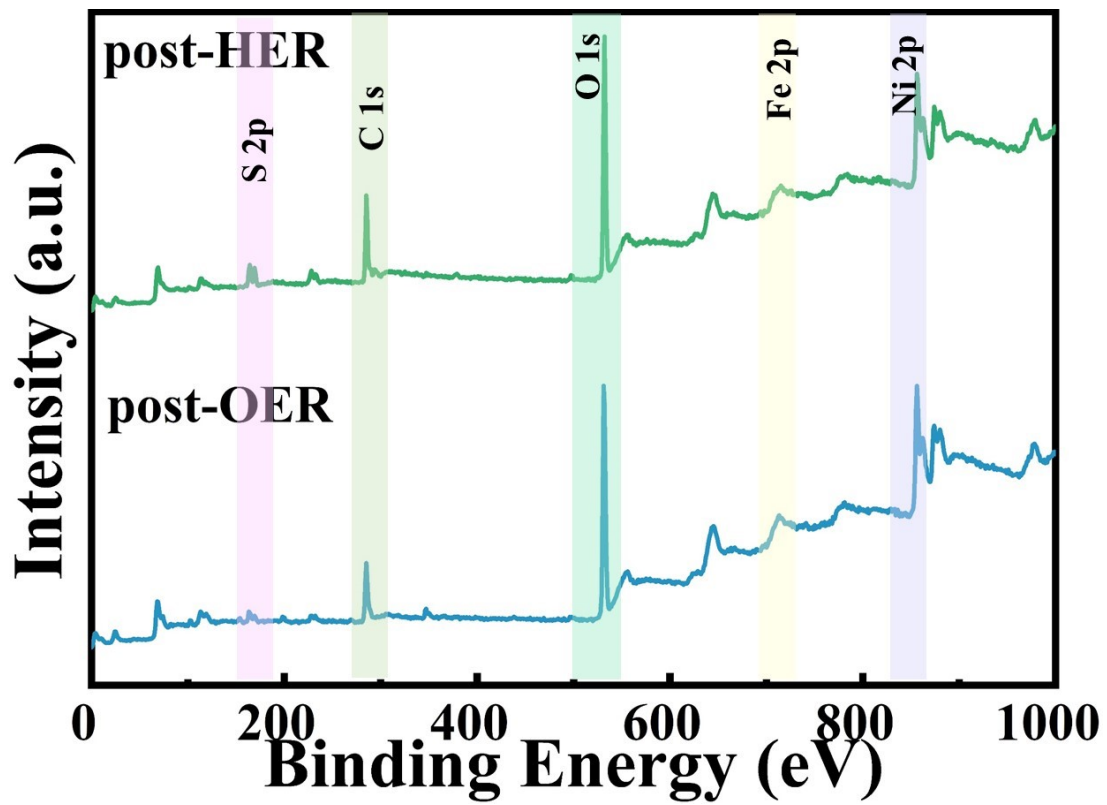

**Fig. S24** High-resolution X-ray photoelectron spectroscopy spectrum for Fe-NiS@HA: (a) full spectrum, (b) Fe 2p, (c) Ni 2p, (d) S 2p and (e) O 1s.

**Table S1.** Comparison of HER performance of Fe-NiS@HA electrode with recently reported sulfur-based catalysts under alkaline conditions and catalysts for electrolysis of alkaline simulated seawater.

| Catalyst                                                                      | System                   | $\eta_{10}$<br>(mV) | Tafel slope<br>(mV/dec) | References |
|-------------------------------------------------------------------------------|--------------------------|---------------------|-------------------------|------------|
| Fe-NiS@HA                                                                     | 1.0 M KOH+<br>0.5 M NaCl | 53                  | 89.3                    | This work  |
| S-Ni <sub>3</sub> Se <sub>4</sub> &Se - Ni <sub>3</sub> S <sub>2</sub> /NF    | 1.0 M KOH                | 89                  | 61                      | 1          |
| S-NiFeOOH/NF                                                                  | 1.0 M KOH                | 176                 | 90                      | 2          |
| Vs-Ni <sub>3</sub> S <sub>2</sub> /NF                                         | 1.0 M KOH                | 88                  | 87                      | 3          |
| Ni-S-Se/NF                                                                    | 1.0 M KOH                | 98                  | 99.4                    | 4          |
| Vs-Co <sub>3</sub> S <sub>4</sub> @NF                                         | 1.0 M KOH                | 45                  | 66                      | 5          |
| Ni <sub>3</sub> Bi <sub>2</sub> S <sub>2</sub> @NF                            | 1.0 M KOH                | 45                  | 53.6                    | 6          |
| Cu <sub>8</sub> S <sub>5</sub> /NSC-900                                       | 1.0 M KOH                | 137                 | 136.8                   | 7          |
| S-RuP@NPSC                                                                    | 1.0 M KOH                | 92                  | 90.23                   | 8          |
| Ag500-<br>MoS <sub>2</sub> @Ni <sub>3</sub> S <sub>2</sub> /NF                | 1.0 M KOH                | 33                  | 41.7                    | 9          |
| Co@MoS <sub>2</sub> -S <sub>v</sub>                                           | 1.0 M KOH                | 36                  | 33                      | 10         |
| AQS/S                                                                         | 1.0 M KOH                | 62                  | 52                      | 11         |
| CeO <sub>2</sub> /CoS <sub>2</sub> /Ti                                        | 1.0 M KOH                | 36                  | 38                      | 12         |
| NiCoSe S/BP                                                                   | 1.0 M KOH                | 172                 | 128                     | 13         |
| CoSA/N,S-HCS                                                                  | 1.0 M KOH                | 165                 | 95.6                    | 14         |
| P-Fe <sub>3</sub> N@NC NSs/IF                                                 | 1.0 M KOH                | 102                 | 68.59                   | 15         |
| Ni-Sv-MoS <sub>2</sub>                                                        | 1.0 M KOH                | 101                 | 66                      | 16         |
| Co <sub>9</sub> S <sub>8</sub> - MoS <sub>2</sub> /NF                         | 1.0 M KOH                | 110                 | 81.7                    | 17         |
| CoS <sub>x</sub> @Cu <sub>2</sub> MoS <sub>4</sub> -<br>MoS <sub>2</sub> /NSG | 0.1 M KOH                | 118.1               | 41.1                    | 18         |
| NixSy@MnO <sub>x</sub> H <sub>y</sub> /NF                                     | 1.0 M KOH                | 179                 | 95.1                    | 19         |
| P-NiS <sub>2</sub> -500                                                       | 1.0 M KOH                | 73                  | 86.51                   | 20         |

|                                                                                         |                         |                       |      |    |
|-----------------------------------------------------------------------------------------|-------------------------|-----------------------|------|----|
| Ni <sub>3</sub> Bi <sub>2</sub> S <sub>2</sub> @NF (LPTE)                               | 1.0 M KOH               | $\eta_{100}$<br>= 127 | 53.6 | 6  |
| Cu-NiS <sub>2</sub>                                                                     | 1.0 M KOH               | 139                   | 77   | 21 |
| CNFMPO                                                                                  | 1.0 M KOH+<br>0.5M NaCl | 73                    | /    | 22 |
| Ni@CNTs-Mo <sub>x</sub> C/Ni <sub>2</sub> P                                             | 1.0 M KOH+<br>0.5M NaCl | 65.4                  | /    | 23 |
| RuO <sub>2</sub> -C-300                                                                 | 1.0 M KOH+<br>0.5M NaCl | 27                    | /    | 24 |
| 1D-Cu@Co-CoO/Rh                                                                         | 1.0 M KOH+<br>0.5M NaCl | 137.7                 | /    | 25 |
| Ir <sub>0.05</sub> -Co <sub>2</sub> P/Co <sub>2</sub> P <sub>2</sub> O <sub>7</sub> NWs | 1.0 M KOH+<br>0.5M NaCl | 17                    | /    | 26 |
| Mo <sub>x</sub> -Ni <sub>0.85</sub> Se/MoSe <sub>2</sub>                                | 1.0 M KOH+<br>0.5M NaCl | 132                   | /    | 27 |

**Table S2.** Comparison of OER performance of Fe-NiS@HA electrode with recently reported sulfur-based catalysts under alkaline conditions and catalysts for electrolysis of alkaline simulated seawater.

| Catalyst                                                                      | System                   | $\eta_{10}$<br>(mV)   | Tafel<br>slope<br>(mV/dec) | Reference<br>s |
|-------------------------------------------------------------------------------|--------------------------|-----------------------|----------------------------|----------------|
| Fe-NiS@HA                                                                     | 1.0 M KOH+<br>0.5 M NaCl | 190                   | 92.4                       | This work      |
| S-NiFeOOH/NF                                                                  | 1.0 M KOH                | 220                   | 40                         | 2              |
| Vs-Co <sub>3</sub> S <sub>4</sub> @NF                                         | 1.0 M KOH                | $\eta_{100} =$<br>245 | 60                         | 5              |
| Ni <sub>3</sub> Bi <sub>2</sub> S <sub>2</sub> @NF                            | 1.0 M KOH                | 127                   | 40.9                       | 6              |
| Cu <sub>8</sub> S <sub>5</sub> /NSC-900                                       | 1.0 M KOH                | 313                   | 66.5                       | 28             |
| A-AQS/S                                                                       | 1.0 M KOH                | 133                   | 40                         | 11             |
| NiCoSe S/BP                                                                   | 1.0 M KOH                | 285                   | 116                        | 13             |
| CoSA/N,S-HCS                                                                  | 1.0 M KOH                | 306                   | 38.1                       | 14             |
| P-Fe <sub>3</sub> N@NC NSs/IF                                                 | 1.0 M KOH                | 270                   | 89.72                      | 15             |
| Co-Sv-MoS <sub>2</sub>                                                        | 1.0 M KOH                | 190                   | 128                        | 16             |
| CoS <sub>x</sub> @Cu <sub>2</sub> MoS <sub>4</sub> -<br>MoS <sub>2</sub> /NSG | 0.1 M KOH                | 351.4                 | 61.5                       | 18             |
| Ni <sub>x</sub> S <sub>y</sub> @MnO <sub>x</sub> Hy/NF                        | 1.0 M KOH                | $\eta_{100} =$<br>326 | 39.0                       | 19             |
| P-NiS <sub>2</sub> -500                                                       | 1.0 M KOH                | $\eta_{100} =$<br>350 | 118.17                     | 20             |
| Ni <sub>3</sub> Bi <sub>2</sub> S <sub>2</sub> @NF (LPTE)                     | 1.0 M KOH                | $\eta_{100} =$<br>316 | 40.9                       | 6              |
| Cu-NiS <sub>2</sub>                                                           | 1.0 M KOH                | 232                   | 46                         | 21             |
| Fe-Ni <sub>3</sub> S <sub>2</sub>                                             | 1.0 M KOH                | $\eta_{100} =$<br>290 | 46.9                       | 29             |
| Co/CoS/Fe-HSNC-<br>700                                                        | 1.0 M KOH                | 250                   | 62.6                       | 30             |
| CCS-NiFeP-10                                                                  | 1.0 M KOH                | 201                   | 41.2                       | 31             |
| Re/ReS <sub>2</sub> -7H/CC                                                    | 1.0 M KOH                | 290                   | 81                         | 32             |
| MoS <sub>2</sub> -AB/NF                                                       | 1.0 M KOH                | 248                   | 72.8                       | 33             |
| Ru@MoO(S) <sub>3</sub>                                                        | 1.0 M KOH                | 265                   | 51                         | 34             |

|                                                 |                         |     |   |    |
|-------------------------------------------------|-------------------------|-----|---|----|
| CoFe-Ni <sub>2</sub> P                          | 1.0 M KOH+<br>0.5M NaCl | 213 | / | 35 |
| RuO <sub>2</sub> -C-300                         | 1.0 M KOH+<br>0.5M NaCl | 346 | / | 24 |
| CNFMPO                                          | 1.0 M KOH+<br>0.5M NaCl | 282 | / | 22 |
| GDY/RhO <sub>x</sub> /GDY                       | 1.0 M KOH+<br>0.5M NaCl | 193 | / | 36 |
| Ag/NiFeRu LDH                                   | 1.0 M KOH+<br>0.5M NaCl | 203 | / | 37 |
| Ni@CNTs-<br>Mo <sub>x</sub> C/Ni <sub>2</sub> P | 1.0 M KOH+<br>0.5M NaCl | 220 | / | 23 |

---

**Table S3.** Comparison of OWS performance of Fe-NiS@HA electrode with recently reported sulfur-based catalysts under alkaline conditions and catalysts for electrolysis of alkaline simulated seawater.

| Catalyst                                                                                              | System                   | Voltage <sub>10</sub> (V)        | References |
|-------------------------------------------------------------------------------------------------------|--------------------------|----------------------------------|------------|
| FeNiS@HA                                                                                              | 1.0 M KOH+<br>0.5 M NaCl | 1.52                             | This work  |
| AQS/S    A-AQS/S                                                                                      | 1.0 M KOH                | 1.43                             | 11         |
| NixSy@MnOxHy/NF                                                                                       | 1.0 M KOH                | 1.53                             | 19         |
| S-NiFeP-20  S-NiFeP-10                                                                                | 1.0 M KOH                | 1.5                              | 31         |
| Re/ReS <sub>2</sub> -7H/CC                                                                            | 1.0 M KOH                | 1.3                              | 32         |
| CoNi <sub>2</sub> S <sub>4</sub> /Ni <sub>3</sub> S <sub>2</sub> @NF                                  | 1.0 M KOH                | 1.65                             | 38         |
| Ni <sub>3</sub> Se <sub>2</sub> /MoSe <sub>x</sub>                                                    | 1.0 M KOH                | 1.57                             | 39         |
| NiMoS                                                                                                 | 1.0 M KOH                | 1.53                             | 40         |
| MoS <sub>2</sub> /NiS/NF                                                                              | 1.0 M KOH                | 1.5                              | 41         |
| Co <sub>3</sub> S <sub>4</sub> @MoS <sub>2</sub> -Ni <sub>3</sub> S <sub>2</sub>                      | 1.0 M KOH                | 1.72(50 mA<br>cm <sup>-2</sup> ) | 42         |
| MoO <sub>2</sub> @MoS <sub>2</sub> @Co <sub>9</sub> S <sub>8</sub>                                    | 1.0 M KOH                | 1.62                             | 43         |
| (SFCNF)/Co <sub>1-x</sub> S@CoN                                                                       | 1.0 M KOH                | 1.58                             | 44         |
| NiCoSe S/BP                                                                                           | 1.0 M KOH                | 1.67                             | 13         |
| P-Fe <sub>3</sub> N@NC NSs/IF                                                                         | 1.0 M KOH                | 1.61                             | 15         |
| NixSy@MnOxHy/NF                                                                                       | 1.0 M KOH                | 1.529                            | 19         |
| Ag500-MoS <sub>2</sub> @Ni <sub>3</sub> S <sub>2</sub> /NF                                            | 1.0 M KOH                | 1.47                             | 9          |
| Cu <sub>8</sub> S <sub>5</sub> /NSC                                                                   | 1.0 M KOH                | 1.64                             | 28         |
| NFO-S <sub>x</sub> /IF                                                                                | 1.0 M KOH                | 1.43                             | 45         |
| NiSe <sub>2</sub> /Ni <sub>3</sub> Se <sub>4</sub> /NF                                                | 1.0 M KOH                | 1.56                             | 46         |
| Ni <sub>3</sub> Bi <sub>2</sub> S <sub>2</sub> @NF                                                    | 1.0 M KOH                | 1.4                              | 6          |
| Co <sub>3</sub> O <sub>4</sub> @Mo-Co <sub>3</sub> S <sub>4</sub> -Ni <sub>3</sub> S <sub>2</sub> /NF | 1.0 M KOH                | 1.62                             | 47         |

|                                                                                         |                         |      |    |
|-----------------------------------------------------------------------------------------|-------------------------|------|----|
| Ir <sub>0.05</sub> -Co <sub>2</sub> P/Co <sub>2</sub> P <sub>2</sub> O <sub>7</sub> NWs | 1.0 M KOH+<br>0.5M NaCl | 1.62 | 26 |
| CNFMPO                                                                                  | 1.0 M KOH+<br>0.5M NaCl | 1.56 | 22 |
| Mn-doped Ni <sub>2</sub> P/Fe <sub>2</sub> P                                            | 1.0 M KOH+<br>0.5M NaCl | 1.64 | 48 |
| FMCO/NF                                                                                 | 1.0 M KOH+<br>0.5M NaCl | 1.58 | 49 |
| GDY/RhO <sub>x</sub> /GDY                                                               | 1.0 M KOH+<br>0.5M NaCl | 1.42 | 36 |
| Ni@CNTs-Mo <sub>x</sub> C/Ni <sub>2</sub> P                                             | 1.0 M KOH+<br>0.5M NaCl | 1.54 | 23 |

---

## References

1. T.Y. Liu, P. Diao, Z. Lin, H.L. Wang, Sulfur and selenium doped nickel chalcogenides as efficient and stable electrocatalysts for hydrogen evolution reaction: The importance of the dopant atoms in and beneath the surface, *Nano Energy*, 2020, **74**, 11.
2. C. Kim, S.H. Kim, S. Lee, I. Kwon, S.H. Kim, S. Kim, C. Seok, Y.S. Park, Y. Kim, Boosting overall water splitting by incorporating sulfur into NiFe (oxy)hydroxide, *J. Energy Chem.*, 2022, **64**, 364-371.
3. D. Jia, L. Han, Y. Li, W. He, C. Liu, J. Zhang, C. Chen, H. Liu, H.L. Xin, Optimizing electron density of nickel sulfide electrocatalysts through sulfur vacancy engineering for alkaline hydrogen evolution, *J Mater. Chem. A*, 2020, **8**, 18207-18214.
4. N. Chen, Y.-X. Du, G. Zhang, W.-T. Lu, F.-F. Cao, Amorphous nickel sulfoselenide for efficient electrochemical urea-assisted hydrogen production in alkaline media, *Nano Energy*, 2021, **81**, 105605.
5. Q. Wang, H. Xu, X. Qian, G. He, H. Chen, Sulfur vacancies engineered self-supported Co<sub>3</sub>S<sub>4</sub> nanoflowers as an efficient bifunctional catalyst for electrochemical water splitting, *Appl. Catal. B Environ.*, 2023, **322**, 122104.
6. D. Yao, W. Hao, S. Weng, M. Hou, W. Cen, G. Li, Z. Chen, Y. Li, Local Photothermal Effect Enabling Ni<sub>3</sub>Bi<sub>2</sub>S<sub>2</sub> Nanoarray Efficient Water Electrolysis at Large Current Density, *Small*, 2022, **18**, 2106868.
7. L.L. Wang, W. He, D.D. Yin, Y.R. Xie, H.L. Zhang, Q.L. Ma, W.S. Yu, Y. Yang, X.T. Dong, Achieving efficient urea electrolysis by spatial confinement effect and heterostructure, *Chem. Eng. J.*, 2023, **462**,
8. X. Liu, F. Liu, J. Yu, G. Xiong, L. Zhao, Y. Sang, S. Zuo, J. Zhang, H. Liu, W. Zhou, Charge Redistribution Caused by S,P Synergistically Active Ru Endows an Ultrahigh Hydrogen Evolution Activity of S-Doped RuP Embedded in N,P,S-Doped Carbon, *Adv. Sci.*, 2020, **7**, 2001526.
9. X. Tong, Y. Li, Q. Ruan, N. Pang, Y. Zhou, D. Wu, D. Xiong, S. Xu, L. Wang, P.K. Chu, Plasma Engineering of Basal Sulfur Sites on MoS<sub>2</sub>@Ni<sub>3</sub>S<sub>2</sub> Nanorods for the Alkaline Hydrogen Evolution Reaction, *Adv. Sci.*, 2022, **9**, 2104774.
10. P.A. Koudakan, C. Wei, A. Mosallanezhad, B. Liu, Y. Fang, X. Hao, Y. Qian, G. Wang, Constructing Reactive Micro-Environment in Basal Plane of MoS<sub>2</sub> for pH-Universal Hydrogen Evolution Catalysis, *Small*, 2022, **18**, 2107974.
11. Y. Chen, Z. Yu, R. Jiang, J. Huang, Y. Hou, J. Chen, Y. Zhang, H. Zhu, B. Wang, M. Wang, 3D-Stretched Film Ni<sub>3</sub>S<sub>2</sub> Nanosheet/Macromolecule Anthraquinone Derivative Polymers for Electrocatalytic Overall Water Splitting, *Small*, 2021, **17**, 2101003.
12. J. Li, Z. Xia, Q. Xue, M. Zhang, S. Zhang, H. Xiao, Y. Ma, Y. Qu, Insights into the Interfacial Lewis Acid-Base Pairs in CeO<sub>2</sub>-Loaded CoS<sub>2</sub> Electrocatalysts for Alkaline Hydrogen Evolution, *Small*, 2021, **17**, 2103018.
13. T. Liang, S. Lenus, Y. Liu, Y. Chen, T. Sakthivel, F. Chen, F. Ma, Z. Dai, Interface and M<sub>3</sub><sup>+</sup>/M<sub>2</sub><sup>+</sup> Valence Dual-Engineering on Nickel Cobalt Sulfoselenide/Black Phosphorus Heterostructure for Efficient Water Splitting Electrocatalysis, *Energy Environ. Mater.*, 2023, **6**, e12332.
14. Z. Zhang, X. Zhao, S. Xi, L. Zhang, Z. Chen, Z. Zeng, M. Huang, H. Yang, B. Liu, S.J. Pennycook, P. Chen, Atomically Dispersed Cobalt Trifunctional Electrocatalysts with Tailored Coordination Environment for Flexible Rechargeable Zn-Air Battery and Self-Driven Water Splitting, *Adv. Energy Mater.*, 2020, **10**, 2002896.
15. G. Li, J. Yu, W. Yu, L. Yang, X. Zhang, X. Liu, H. Liu, W. Zhou, Phosphorus-Doped Iron Nitride Nanoparticles Encapsulated by Nitrogen-Doped Carbon Nanosheets on Iron Foam In Situ Derived from



- Saccharomyces Cerevisiae for Electrocatalytic Overall Water Splitting, *Small*,2020, **16**, 2001980.
16. Y. Ma, D. Leng, X. Zhang, J. Fu, C. Pi, Y. Zheng, B. Gao, X. Li, N. Li, P.K. Chu, Y. Luo, K. Huo, Enhanced Activities in Alkaline Hydrogen and Oxygen Evolution Reactions on MoS<sub>2</sub> Electrocatalysts by In-Plane Sulfur Defects Coupled with Transition Metal Doping, *Small*,2022, **18**, 2203173.
  17. M. Kim, M.A.R. Anjum, M. Choi, H.Y. Jeong, S.H. Choi, N. Park, J.S. Lee, Covalent 0D–2D Heterostructuring of Co<sub>9</sub>S<sub>8</sub>–MoS<sub>2</sub> for Enhanced Hydrogen Evolution in All pH Electrolytes, *Adv. Funct. Mater.*,2020, **30**, 2002536.
  18. D.C. Nguyen, D.T. Tran, T.L.L. Doan, D.H. Kim, N.H. Kim, J.H. Lee, Rational Design of Core@shell Structured CoS<sub>x</sub>@Cu<sub>2</sub>MoS<sub>4</sub> Hybridized MoS<sub>2</sub>/N,S-Codoped Graphene as Advanced Electrocatalyst for Water Splitting and Zn-Air Battery, *Adv. Energy Mater.*,2020, **10**, 1903289.
  19. M.Y. Wang, J.H. Zhong, Z.H. Zhu, A.M. Gao, F.Y. Yi, J.Z. Ling, J.N. Hao, D. Shu, Hollow NiCoP nanocubes derived from a Prussian blue analogue self-template for high-performance supercapacitors, *J. Alloy. Compd.*,2022, **893**, 14323.
  20. S. Huang, Z. Jin, P. Ning, C. Gao, Y. Wu, X. Liu, P. Xin, Z. Chen, Y. Jiang, Z. Hu, Z. Chen, Synergistically modulating electronic structure of NiS<sub>2</sub> hierarchical architectures by phosphorus doping and sulfur-vacancies defect engineering enables efficient electrocatalytic water splitting, *Chem. Eng. J.*,2021, **420**, 127630.
  21. K.N. Dinh, Y. Sun, Z. Pei, Z. Yuan, A. Suwardi, Q. Huang, X. Liao, Z. Wang, Y. Chen, Q. Yan, Electronic Modulation of Nickel Disulfide toward Efficient Water Electrolysis, *Small*,2020, **16**, 1905885.
  22. H.M. Zhang, L.H. Zuo, Y.H. Gao, J.X. Guo, C.Z. Zhu, J. Xu, J.F. Sun, Amorphous high-entropy phosphoxides for efficient overall alkaline water/seawater splitting, *J. Mater. Sci. Technol.*,2024, **173**, 1-10.
  23. J.Q. Wang, D.T. Tran, K. Chang, S. Prabhakaran, J.H. Zhao, D.H. Kim, N.H. Kim, J.H. Lee, Hierarchical Ni@CNTs-bridged Mo<sub>x</sub>C/Ni<sub>2</sub>P heterostructure micro-pillars for enhanced seawater splitting and Mg/seawater battery, *Nano Energy*,2023, **111**, 108440.
  24. F. Fang, Y. Wang, L.W. Shen, G. Tian, D. Cahen, Y.X. Xiao, J.B. Chen, S.M. Wu, L. He, K.I. Ozoemena, M.D. Symes, X.Y. Yang, Interfacial Carbon Makes Nano-Particulate RuO<sub>2</sub> an Efficient, Stable, pH-Universal Catalyst for Splitting of Seawater, *Small*,2022, **18**, 2203778.
  25. P.K.L. Tran, D.T. Tran, D. Malhotra, S. Prabhakaran, D. Kim, N.H. Kim, J.H. Lee, Highly Effective Freshwater and Seawater Electrolysis Enabled by Atomic Rh-Modulated Co-CoO Lateral Heterostructures, *Small*,2021, **17**, 2103826.
  26. V. Hoa, M. Austeria, H.T. Dao, M. Mai, D. Kim, Dual-phase cobalt phosphide/phosphate hybrid interactions via iridium nanocluster interfacial engineering toward efficient overall seawater splitting, *Appl. Catal. B Environ.*,2023, **327**, 122467.
  27. Z.M. He, C.X. Zhang, S.Q. Guo, P. Xu, Y. Ji, S.W. Luo, X. Qi, Y.D. Liu, N.Y. Cheng, S.X. Dou, Y.X. Wang, B.W. Zhang, Mo-doping heterojunction: interfacial engineering in an efficient electrocatalyst for superior simulated seawater hydrogen evolution, *Chem. Sci.*,2024, **15**, 1123-1131.
  28. Y. Zhang, L. Chen, B. Yan, F. Zhang, Y. Shi, X. Guo, Regeneration of textile sludge into Cu<sub>8</sub>S<sub>5</sub> decorated N, S self-doped interconnected porous carbon as an advanced bifunctional electrocatalyst for overall water splitting, *Chem. Eng. J.*,2023, **451**, 138497.
  29. Y. Liu, S.J. Xu, X.Y. Zheng, Y.K. Lu, D. Li, D.L. Jiang, Ru-doping modulated cobalt phosphide nanoarrays as efficient electrocatalyst for hydrogen evolution reaction, *J. Colloid Interface Sci.*,2022, **625**, 457-465.
  30. L. Yan, H. Wang, J. Shen, J. Ning, Y. Zhong, Y. Hu, Formation of mesoporous Co/CoS/Metal-N-

- C@S, N-codoped hairy carbon polyhedrons as an efficient trifunctional electrocatalyst for Zn-air batteries and water splitting, *Chem. Eng. J.*,2021, **403**, 126385.
31. S. Li, L. Wang, H. Su, A.N. Hong, Y. Wang, H. Yang, L. Ge, W. Song, J. Liu, T. Ma, X. Bu, P. Feng, Electron Redistributed S-Doped Nickel Iron Phosphides Derived from One-Step Phosphatization of MOFs for Significantly Boosting Electrochemical Water Splitting, *Adv. Funct. Mater.*,2022, **32**, 2200733.
32. Q.-Q. Pang, Z.-L. Niu, S.-S. Yi, S. Zhang, Z.-Y. Liu, X.-Z. Yue, Hydrogen-Etched Bifunctional Sulfur-Defect-Rich ReS<sub>2</sub>/CC Electrocatalyst for Highly Efficient HER and OER, *Small*,2020, **16**, 2003007.
33. L. Guo, Q. Liu, Y. Liu, Z. Chen, Y. Jiang, H. Jin, T. Zhou, J. Yang, Y. Liu, Self-supported tremella-like MoS<sub>2</sub>-AB particles on nickel foam as bifunctional electrocatalysts for overall water splitting, *Nano Energy*,2022, **92**, 106707.
34. D. Chen, R. Yu, D. Wu, H. Zhao, P. Wang, J. Zhu, P. Ji, Z. Pu, L. Chen, J. Yu, S. Mu, Anion-modulated molybdenum oxide enclosed ruthenium nano-capsules with almost the same water splitting capability in acidic and alkaline media, *Nano Energy*,2022, **100**, 107445.
35. C.Q. Huang, Q.C. Zhou, L. Yu, D.S. Duan, T.Y. Cao, S.H. Qiu, Z.Z. Wang, J. Guo, Y.X. Xie, L.P. Li, Y. Yu, Functional Bimetal Co-Modification for Boosting Large-Current-Density Seawater Electrolysis by Inhibiting Adsorption of Chloride Ions, *Adv. Energy Mater.*,2023, **13**, 2301475.
36. Y. Gao, Y.R. Xue, F. He, Y.L. Li, Controlled growth of a high selectivity interface for seawater electrolysis, *Proc. Natl. Acad. Sci. U. S. A.*,2022, **119**, 7.
37. H.Y. Chen, R.T. Gao, H.J. Chen, Y. Yang, L.M. Wu, L. Wang, Ruthenium And Silver Synergetic Regulation NiFe LDH Boosting Long-Duration Industrial Seawater Electrolysis, *Adv. Funct. Mater.*,2024, 2315674.
38. W. Dai, K. Ren, Y.-a. Zhu, Y. Pan, J. Yu, T. Lu, Flower-like CoNi<sub>2</sub>S<sub>4</sub>/Ni<sub>3</sub>S<sub>2</sub> nanosheet clusters on nickel foam as bifunctional electrocatalyst for overall water splitting, *J. Alloys Compd.*,2020, **844**, 156252.
39. Y. Tian, X. Xue, Y. Gu, Z. Yang, G. Hong, C. Wang, Electrodeposition of Ni<sub>3</sub>Se<sub>2</sub>/MoS<sub>x</sub> as a bifunctional electrocatalyst towards highly-efficient overall water splitting, *Nanoscale*,2020, **12**, 23125-23133.
40. C. Wang, X. Shao, J. Pan, J. Hu, X. Xu, Redox bifunctional activities with optical gain of Ni<sub>3</sub>S<sub>2</sub> nanosheets edged with MoS<sub>2</sub> for overall water splitting, *Appl. Catal. B Environ.*,2020, **268**, 118435.
41. X. Xu, W. Zhong, L. Zhang, G. Liu, Y. Du, MoS<sub>2</sub>/NiS heterostructure grown on Nickel Foam as highly efficient bifunctional electrocatalyst for overall water splitting, *Int. J. Hydrogen Energy*,2020, **45**, 17329-17338.
42. A. Muthurasu, G.P. Ojha, M. Lee, H.Y. Kim, Zeolitic imidazolate framework derived Co<sub>3</sub>S<sub>4</sub> hybridized MoS<sub>2</sub>-Ni<sub>3</sub>S<sub>2</sub> heterointerface for electrochemical overall water splitting reactions, *Electrochim. Acta*,2020, **334**, 135537.
43. Y. Li, C. Wang, M. Cui, J. Xiong, L. Mi, S. Chen, Heterostructured MoO<sub>2</sub>@MoS<sub>2</sub>@Co<sub>9</sub>S<sub>8</sub> nanorods as high efficiency bifunctional electrocatalyst for overall water splitting, *Appl. Surf. Sci.*,2021, **543**, 148804.
44. D. Guo, J. Wang, L. Zhang, X.a. Chen, Z. Wan, B. Xi, Strategic Atomic Layer Deposition and Electrospinning of Cobalt Sulfide/Nitride Composite as Efficient Bifunctional Electrocatalysts for Overall Water Splitting, *Small*,2020, **16**, 2002432.
45. X. Chen, Z. Qiu, H. Xing, S. Fei, J. Li, L. Ma, Y. Li, D. Liu, Sulfur-doping/leaching induced structural

transformation toward boosting electrocatalytic water splitting, *Appl. Catal. B Environ.*,2022, **305**, 121030.

46. L. Tan, J. Yu, H. Wang, H. Gao, X. Liu, L. Wang, X. She, T. Zhan, Controllable synthesis and phase-dependent catalytic performance of dual-phase nickel selenides on Ni foam for overall water splitting, *Appl. Catal. B Environ.*,2022, **303**, 120915.

47. Q. Wu, A. Dong, C. Yang, L. Ye, L. Zhao, Q. Jiang, Metal-organic framework derived Co<sub>3</sub>O<sub>4</sub>@MoCo<sub>3</sub>S<sub>4</sub>-Ni<sub>3</sub>S<sub>2</sub> heterostructure supported on Ni foam for overall water splitting, *Chem. Eng. J.*,2021, **413**, 127482.

48. Y.Z. Luo, P. Wang, G.X. Zhang, S.S. Wu, Z.S. Chen, H. Ranganathan, S.H. Sun, Z.C. Shi, Mn-doped nickel-iron phosphide heterointerface nanoflowers for efficient alkaline freshwater/seawater splitting at high current densities, *Chem. Eng. J.*,2023, **454**, 140061.

49. W.X. Liu, W.B. Que, R.L. Yin, J.L. Dai, D. Zheng, J.X. Feng, X.L. Xu, F.F. Wu, W.H. Shi, X.J. Liu, X.H. Cao, Ferrum-molybdenum dual incorporated cobalt oxides as efficient bifunctional anti-corrosion electrocatalyst for seawater splitting, *Appl. Catal. B Environ.*,2023, **328**, 122488.
